# Supplementary material for: KvLEA, a New Isolated Late Embryogenesis Abundant Protein Gene from Kosteletzkya virginica Responding to Multiabiotic Stresses
Source: PubMed Central journal article supplement (PMC4829701; doi:10.1155/2016/9823697), 2016-03-30
Supplement: 9823697.f1.pdf [file 9823697.f1.pdf]

Supplementary figures:

S1 Figure.

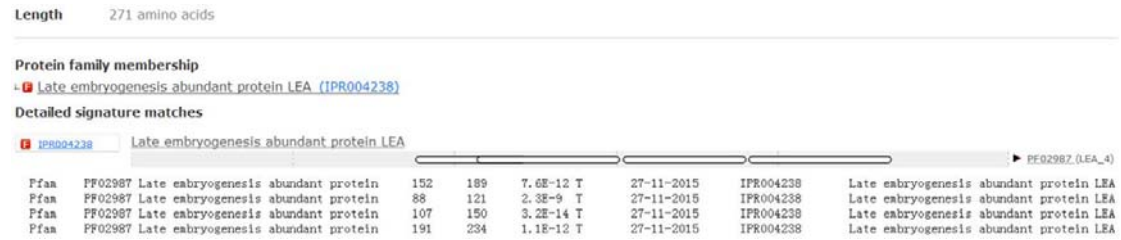

The motif analysis by InterProScan 5 (<http://www.ebi.ac.uk/Tools/pfa/iprscan5/>). The analysis result showed that there were four repeats of LEA\_4 (Pfam02987) motif in the predicted KvLEA protein.

S2 Figure.

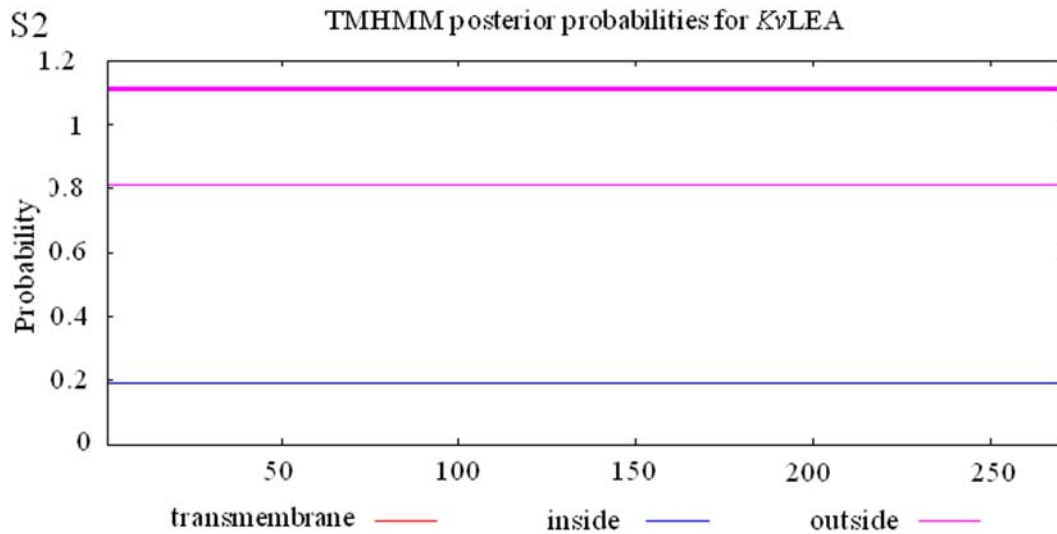

Transmembrane domain prediction was carried out with TMHMM software (<http://www.cbs.dtu.dk/services/TMHMM/>). The red line on the above represents transmembrane, blue line below represents inside and pink line in the middle of the two represents outside.

Supplemental table S3

**S3 Table.** The gene IDs and names of the 18 LEA<sub>4</sub> proteins in Arabidopsis

| <b>Gene Name</b> | <b>Gene ID</b> | <b>Gene Name</b> | <b>Gene ID</b> | <b>Gene Name</b> | <b>Gene ID</b> |
|------------------|----------------|------------------|----------------|------------------|----------------|
| At1g52690        | 841701         | At2g42530        | 818853         | At3g53040        | 824470         |
| At1g72100        | 843541         | At2g42540        | 818854         | At4g13230        | 826939         |
| At2g03740        | 814901         | At2g42560        | 818856         | At4g13560        | 826989         |
| At2g03850        | 814911         | At3g02480        | 821185         | At4g21020        | 827849         |
| At2g18340        | 816349         | At3g15670        | 820810         | At4g36600        | 829812         |
| At2g36640        | 818236         | At3g17520        | 821017         | At5g44310        | 834454         |
